# Supplementary material for: Celecoxib Prevents Doxorubicin-Induced Multidrug Resistance in Canine and Mouse Lymphoma Cell Lines
Source: PubMed Central journal article supplement (PMC7280963; doi:10.3390/cancers12051117), 2020-04-29
Supplement: cancers-12-01117-s001.pdf [file cancers-12-01117-s001.pdf]

# Celecoxib Prevents Doxorubicin-Induced Multidrug Resistance in Canine and Mouse Lymphoma Cell Lines

Edina Karai, Kornélia Szabéni, Tímea Windt, Sára Fehér, Eszter Szendi, Valéria Dékay, Péter Vajdovich, Gergely Szakács and András Füredi

**Table S1.** Immunohistochemical findings of the two patients.

| Patient 1            | Markers                           | Results                                           |
|----------------------|-----------------------------------|---------------------------------------------------|
| Immunohistochemistry | CD79a                             | Diffuse positivity.                               |
|                      | CD3                               | Tumor cells do not express the antigen.           |
|                      | Ki67                              | Average 30-40% positivity.                        |
| Diagnosis            | Large cell immunoblastic lymphoma |                                                   |
| Patient 2            |                                   |                                                   |
| Immunohistochemistry | CD79a                             | Diffuse positivity.                               |
|                      | CD3                               | Expression cells are scattered in the tumor area. |
|                      | Ki67                              | Average 60% positivity.                           |
| Diagnosis            | Diffuse large B-cell lymphoma     |                                                   |

Two canine patients were diagnosed with B-cell lymphoma according to the immunohistochemistry.

**Table S2.** Detailed description of the used treatment protocols.

| Patient 1 modified CHOP |                                             |         |                                             |
|-------------------------|---------------------------------------------|---------|---------------------------------------------|
| week 1                  | vincristine, prednisolone                   | week 13 | no treatment (low WBC)                      |
| week 2                  | vincristine, cyclophosphamide, prednisolone | week 14 | vincristine                                 |
| week 3                  | vincristine, prednisolone                   | week 15 | vincristine, prednisolone                   |
| week 4                  | vincristine, prednisolone                   | week 16 | doxorubicin, prednisolone                   |
| week 5                  | vincristine, cyclophosphamide, prednisolone | week 17 | vincristine, prednisolone                   |
| week 6                  | no treatment (low WBC)                      | week 18 | vincristine, prednisolone                   |
| week 7                  | vincristine, prednisolone                   | week 19 | vincristine, cyclophosphamide               |
| week 8                  | vincristine                                 | week 20 | no treatment (low WBC)                      |
| week 9                  | vincristine, cyclophosphamide               | week 21 | vincristine                                 |
| week 10                 | vincristine                                 | week 22 | vincristine                                 |
| week 11                 | vincristine                                 | week 23 | vincristine, cyclophosphamide               |
| week 12                 | vincristine, cyclophosphamide               |         |                                             |
| Patient 2 modified CHOP |                                             |         |                                             |
| week 1                  | vincristine, prednisolone                   | week 17 | no treatment (7 days after DOX)             |
| week 2                  | prednisolone                                | week 18 | no treatment (14 days after DOX)            |
| week 3                  | prednisolone                                | week 19 | prednisolone (21 days after DOX)            |
| week 4                  | prednisolone                                | week 20 | doxorubicin, prednisolone                   |
| week 5                  | cyclophosphamide                            | week 21 | Drug Holiday                                |
| week 6                  | no treatment (low WBC)                      | week 22 | Drug Holiday                                |
| week 7                  | vincristine, prednisolone                   | week 23 | Drug Holiday                                |
| week 8                  | doxorubicin, prednisolone                   | week 24 | Drug Holiday                                |
| week 9                  | no treatment (7 days after DOX)             | week 25 | vincristine, cyclophosphamide, prednisolone |
| week 10                 | no treatment (14 days after DOX)            | week 26 | vincristine, prednisolone                   |
| week 11                 | no treatment (21 days after DOX)            | week 27 | prednisolone                                |
| week 12                 | doxorubicin                                 | week 28 | prednisolone                                |
| week 13                 | no treatment (7 days after DOX)             | week 29 | prednisolone                                |
| week 14                 | no treatment (14 days after DOX)            | week 30 | prednisolone                                |

|         |                                  |         |              |
|---------|----------------------------------|---------|--------------|
| week 15 | no treatment (21 days after DOX) | week 31 | prednisolone |
| week 16 | doxorubicin                      | week 32 | prednisolone |

Two canine patients were treated according to the modified CHOP protocol. In case of Patient 2. between two doxorubicin treatment the bone marrow recovery time was 28 days.

**Table S3.** Cell surface markers used for immunophenotyping CLBL-1 cells.

| CD markers       |         |
|------------------|---------|
|                  | CD14 -  |
| CD45             | + CD3 - |
| MHC II           | + CD4 - |
| CD79 $\alpha$ cy | + CD5 - |
|                  | CD21 -  |
|                  | CD11d - |

The immunophenotype of CLBL-1 cells were verified according to (Rütgen et al., 2010. Leukemia Research) [1].

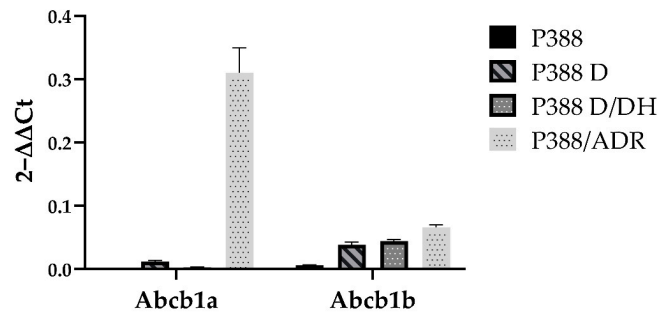

**Figure S1.** mRNA expression of P388 cells after DOX treatment and following a drug holiday including data obtained from P388/ADR cells (doxorubicin selected subline of P388).

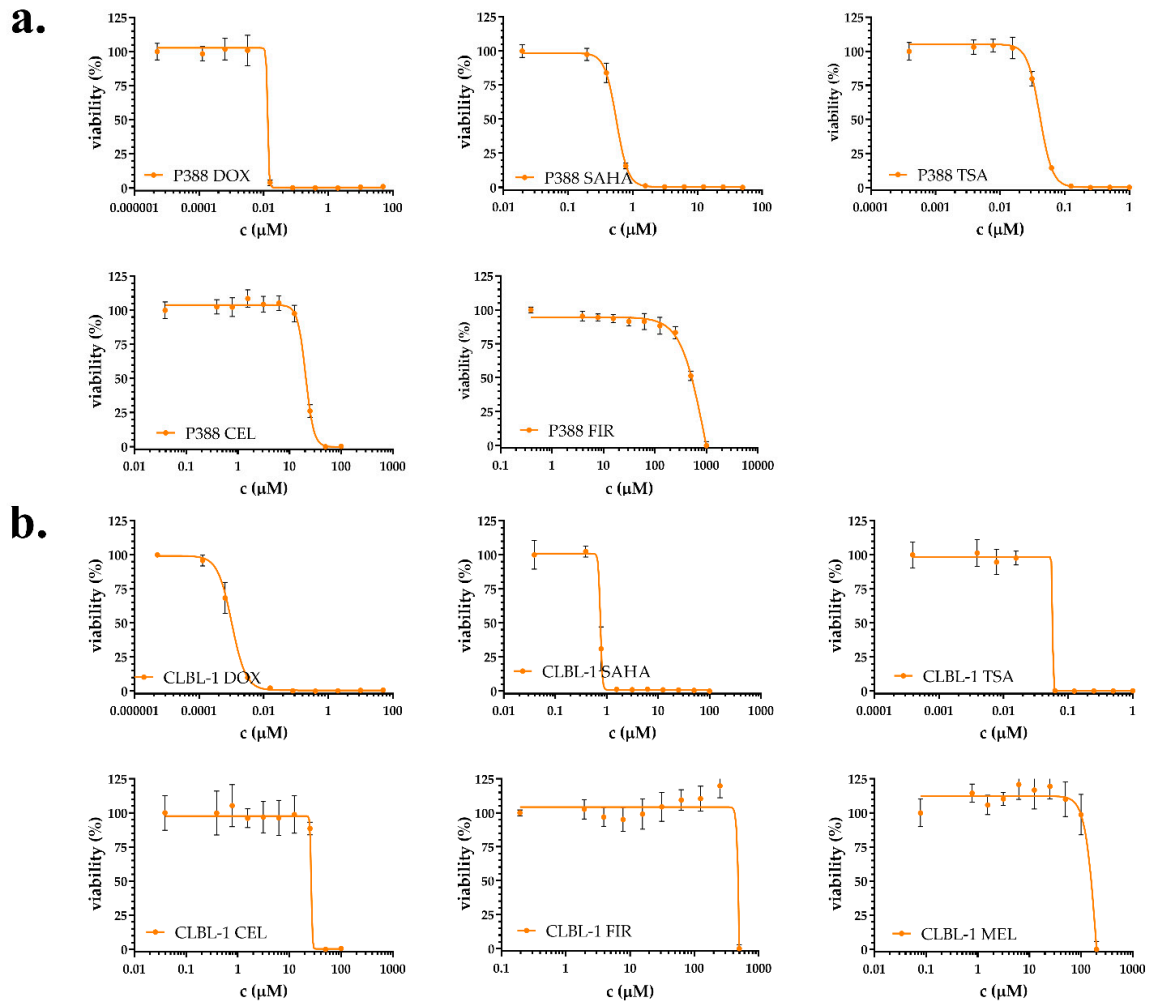

**Figure S2.** Citotoxicity curves of P388 (a) and CLBL-1 (b) cells showing drug sensitivity to Doxorubicin (DOX), SAHA, Trichostatin A (TSA), Celecoxib (CEL) and Firocoxib (FIR) for both cell lines. Additionally, Meloxicam (MEL) was tested only on CLBL-1 cells (b).

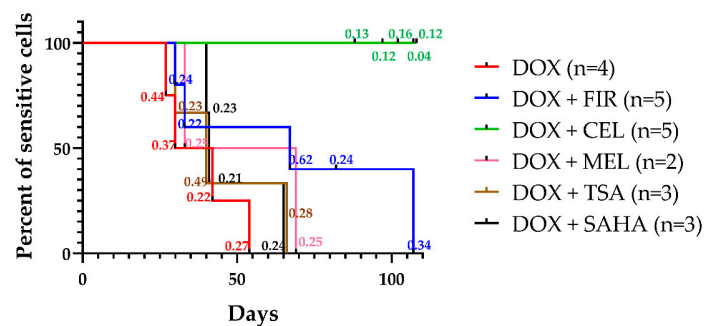

**Figure S3.** Kaplan-Meier curves of cell cultures including actual MAF values. Cells were considered resistant at MAF  $\geq 0.2$ . DOX (red) in combination with FIR (blue), CEL (green), MEL (pink), TSA (brown) and SAHA (black) were tested in 9 sequential treatment cycles.

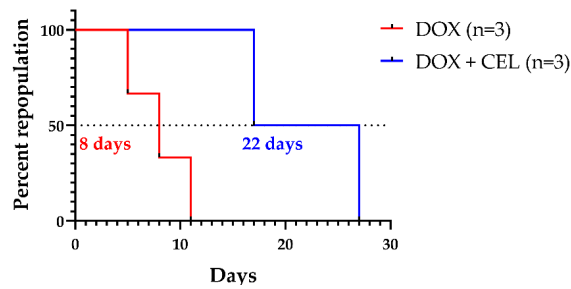

**Figure S4.** Kaplan-Meier curves of cell cultures with including days of repopulation time. CEL+DOX in combination increase repopulation time in both cell lines compared to DOX treatment (22 vs 8 days, respectively).

### Supplementary Materials 1. Cytology Reports

Centroblastic type (Kiel) monomorphic subtype composed of more than 60% centroblasts, which are large cells with scant basophilic cytoplasm, a round nucleus, fine chromatin pattern, and 2–4 basophilic prominent nucleoli located in the margin [2]. They are 10–30  $\mu\text{m}$  in diameter, and the nucleus is less completely heterochromatic than that of in small lymphocyte (they sometimes referred to as large lymphocytes or lymphoblasts) [3]. The cytoplasm is pale blue and more abundant than in small lymphocytes. Their nuclei are 1.5–3 times the size of a red blood cells (RBC) or larger to up to 4 times the size of an RBC. Some nuclei have one moderately large incision (or cleaved). The nuclei of them have a fine diffuse and light chromatin pattern. Nucleoli are prominent, and can be well visible with characteristic margins, and even multiple and/or prominent. The cytoplasm is abundant and often basophilic and may completely encircle the nucleus. Occasionally pale Golgi zone is seen besides the nucleus, at the incision of it. Mitotic figures were estimated by looking at 5 cellular fields under 40x power. In this case it was moderate: 2–3 mitotic figures [4].

### Supplementary Methods 1. Method of Cytology Sampling

Criteria for the involvement of bone marrow by lymphoma were: (1) the presence of > 20% lymphocytes in the sample and/or (2) the presence of large/atypical lymphocytes, even if the proportion was lower than 20% of all nucleated cells (ANC) [5].

The lymph node and bone marrow samples were taken under general anaesthesia. The dogs were anaesthetized (propofol /AstraZeneca Co., Cambridge, UK/ 5 mg/BW kg iv, isoflurane/Abbott Ltd., Budapest, Hungary/ 1.5–2.5 V/V%, fentanyl/Gedeon Richter Plc., Budapest, Hungary/constant rate infusion 0.01 to 0.04 mg/BWkg/hr) and an enlarged lymph node was excised for routine histological and immunohistochemical examination. Bone marrow aspirates were taken for cytological analysis by using a Jamshidi needle from the iliac crest (crista iliaca externa). The aspirates were smeared and stained with a staining kit (Quick panoptic staining kit: Reagens Ltd., Budapest, Hungary) for cytological evaluation.

Sternal recumbency was used for the wing of the ilium. Once the patient was sedated with the above protocol, a BMA was performed using a standard technique [6]. A 2.5cm  $\times$  2.5cm area of the skin was shaved, cleansed, and disinfected with chlorhexidine. Once the site was prepped and local anaesthesia (1–2 mL of lidocaine 2%) injected into the skin, subcutaneous tissues and on the periosteum of the bone, a small nick was made in the skin with a sterile #11 scalpel blade. The BM needle was angled slightly medially and parallel to the wing of the ilium. A 15-gauge BM needle (with the stylet locked in place) was then firmly pushed through the subcutaneous tissues and the dense outer layer of the bone into the marrow. cavity. Once the needle was in contact with the surface of the bone, it was rotated into the bone in a clockwise/counter-clockwise motion. The stylet was then removed, and a 10–12 mL syringe containing 50  $\mu\text{L}$  of 10% EDTA was attached to the needle, and vigorous suction was applied to withdraw a small amount of liquid marrow material into the syringe. The needle and syringe were then removed en bloc from the patient through application of firm traction to the needle. Immediately after collection of the sample, blood-contaminated BM was directly applied to glass slides (direct smears). A second slide was placed on top of the sample to

spread the material, and was then gently pulled to the end of the first slide to create a smear. A minimum of five slides were made for each BMA site.

## References

1. Rütgen, B. C.; Hammer, S. E.; Gerner, W.; Christian, M.; de Arespachoga, A. G.; Willmann, M.; Kleiter, M.; Schwendenwein, I.; Saalmüller, A. Establishment and Characterization of a Novel Canine B-Cell Line Derived from a Spontaneously Occurring Diffuse Large Cell Lymphoma. *Leuk. Res.*, **2010**, *34*, 932–938. <https://doi.org/10.1016/j.leukres.2010.01.021>.
2. Fournel-Fleury, C.; Magnol, J. P.; Bricaire, P.; Marchal, T.; Chabanne, L.; Delverdier, A.; Bryon, P. A.; Felman, P. Cytohistological and Immunological Classification of Canine Malignant Lymphomas: Comparison with Human Non-Hodgkin's Lymphomas. *J. Comp. Pathol.*, **1997**, *117*, 35–59.
3. Raskin, R.; Meyer, D. Canine and Feline Cytology-2nd Edition <https://www.elsevier.com/books/canine-and-feline-cytology/9781416049852> (accessed 2 Mar 2020).
4. Sözmen, M.; Tasca, S.; Carli, E.; De Lorenzi, D.; Furlanello, T.; Caldin, M. Use of Fine Needle Aspirates and Flow Cytometry for the Diagnosis, Classification, and Immunophenotyping of Canine Lymphomas. *J. Vet. Diagn. Invest.*, **2005**, *17*, 323–330. <https://doi.org/10.1177/104063870501700404>.
5. Aubry, O. A.; Spangler, E. A.; Schleis, S. E.; Smith, A. N. Evaluation of Bone Marrow Aspirates from Multiple Sites for Staging of Canine Lymphoma and Mast Cell Tumours. *Vet. Comp. Oncol.* **2014**, *12*, 58–66. <https://doi.org/10.1111/j.1476-5829.2012.00331.x>.
6. Townsend, F. I. Bone Marrow Aspiration in Dogs and Cats. *Lab. Anim. (NY)*, **2008**, *37*, 497–498. <https://doi.org/10.1038/labani1108-497>.

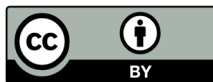

© 2020 by the authors. Licensee MDPI, Basel, Switzerland. This article is an open access article distributed under the terms and conditions of the Creative Commons Attribution (CC BY) license (<http://creativecommons.org/licenses/by/4.0/>).
